# Supplementary material
Source: publisher site journal article supplement (https://www.dovepress.com/article/500014)
Supplement: Supplementary file 1 [file get_supplementary_file.php]

# Supplementary Material 1: Extended Methods section

***16S rRNA amplicon sequencing analysis process***

Briefly, raw sequencing data were uniformed in FASTQ format. Paired-end reads were then preprocessed using Trim- momatic software to detect and cut off ambiguous bases (N). After trimming, paired-end reads were assembled using FLASH software. Then, reads with chimera were detected and removed using QIIME software. The effective tags were clustered into operational taxonomic units (OTUs) of ≥97% similarity using VSearch software. The taxonomy of each representative read was classified into organisms using RDP classifier based on the SILVA database with confidence threshold values ranging from 0.7 to 1. This work was completed by Shanghai OE Biotech Co., Ltd. (Shanghai, China).

***UPLC-Q-Exactive Orbitrap MS***

Briefly, 20 mg of tissue samples were ground with a methanol-water solution (V: V=4:1, with 4 μg/mL of L-2-chlorophenylalanine as an internal standard), sonicated, left overnight, centrifuged to take the supernatant, transferred to a chromatography vial, and stored at -80°C for subsequent LC-MS analysis. The analysis was conducted using a liquid-mass spectrometry system consisting of a Waters ACQUITY UPLC I-Class plus/Thermo QE HF ultra-performance liquid tandem high-resolution mass spectrometer.

The analysis employed an ACQUITY UPLC HSS T3 column (1.8 μm, 2.1 × 100 mm) for both positive and negative modes. The gradient elution system was consisted of solvent A, water with 0.1% formic acid (V/V), and solvent B, acetonitrile with 0.1% formic acid (V/V). The gradient profile was as follows: 0.01 min, 5% B; 2 min, 5% B; 4 min, 30% B; 8 min, 50% B; 10 min, 80% B; 14 min, 100% B; 15 min, 100% B; 15.1 min, 5%, and 16 min, 5%. The flow rate was set at 0.35 mL/min, and the column temperature was maintained at 45°C. All samples were kept at 10 °C throughout the analysis. The injection volume was 3 μL, and the mass spectrometer was operated in a mass range from 100 m/z to 1200 m/z. The resolution of the primary MS scan was 70,000, and the secondary MS scan resolution was 17,500, and the collision energies were set at 10, 20, and 40 eV, respectively. The mass spectrometer was operated as follows: spray voltages of 3800 V (+) and 3200 V (-), sheath gas flow rate of 35 arbitrary units, auxiliary gas flow rate of 8 arbitrary units, capillary temperature of 320°C, Auxiliary gas heater temperature of 350°C, s-shot RF level of 50.

# Supplemental tables

**Table S1** Scoring system for calculating DAI in UC

| **Score** | **Weight loss** | **Stool consistency** | **Blood in the stool** |
| --- | --- | --- | --- |
| 0 | None | Normal | Normal |
| 1 | ≥1 – <5% |  |  |
| 2 | ≥5 – <10% | Very soft | Slight bleeding |
| 3 | ≥10 – <20% |  |  |
| 4 | ≥20% | Watery diarrhea | Gross bleeding |

**Notes:** DAI = (body weight loss score + stool characters score + hematochezia score)

**Table S2** Histological scoring criteria

| **Scores** | **Epithelium (E)** | **Infiltration (I)** |
| --- | --- | --- |
| 0 | Normal morphology | No infiltrate |
| 1 | Loss of goblet cells | Infiltrate around crypt basis |
| 2 | Loss of goblet cells in large areas | Infiltrate reaching to L. muscularis mucosae |
| 3 | Loss of crypts | Extensive infiltration reaching the L. muscularis mucosae and thickening of the mucosa with abundant oedema |
| 4 | Loss of crypts in large areas | Infiltration of the L. submucosa |

**Notes:** total score = E + I

**Table S3** The flavonoid components identified from QAF by UPLC-MS/MS in negative ion modes

| **Comp.**  **NO.** | **RT**  **(min)** | **Compound** | **MW.** | **Measured Mass (m/z)** | **Error**  **(ppm)** | **Formula** | **Fragment Ions (m/z)** |
| --- | --- | --- | --- | --- | --- | --- | --- |
| M1 | 5.40 | Eriocitrin | 596.5 | 595.1663[M-H]- | 0.5 | C27H32O15 | 163.2225,207.2599,287.0156,335.9598,397.3863 |
| M2 | 6.06 | Neoeriocitrin | 596.5 | 595.1663[M-H]- | 1.3 | C27H32O15 | 184.7167,317.7723,372.6348,432.1181 |
| M3 | 6.79 | Naringin 6''-rhamnoside | 726.7 | 725.2293[M-H]- | -1.5 | C33H42O18 | 273.8630,511.8697,581.9604595.1603 |
| M4 | 6.99 | Hesperetin 5-*O*-glucoside | 464.4 | 463.1240[M-H]- | 0.6 | C22H24O11 | 125.0203,217.2966,241.8978,274.3557,299.5672,374.4999 |
| M5 | 7.16 | Narirutin | 580.5 | 579.1714[M-H]- | -1.2 | C27H32O14 | 151.4303,157.0206,271.0521,381.2667 |
| M6 | 7.37 | hesperetin7-(2,6-dirhamnosylglucoside) | 756.7 | 755.2399[M-H]- | -0.7 | C34H44O19 | 251.4706,485.1685,579.1735,609.1774 |
| M7 | 7.54 | Naringin | 580.5 | 579.1714[M-H]- | 0.0 | C27H32O14 | 104.1351,273.4238,419.5801,435.2641 |
| M8 | 7.74 | Hesperidin | 610.6 | 609.1819[M-H]- | -1.0 | C28H34O15 | 131.6167,286.8203,301.0646,579.1722 |
| M9 | 8.05 | Neohesperidin | 610.6 | 609.1819[M-H]- | -2.8 | C28H34O15 | 189.1012,249.5929,313.4481,519.0212 |
| M10 | 9.14 | brutieridin | 754.7 | 753.2242[M-H]- | 0.3 | C34H42O18 | 317.0666,577.1627,593.1519,609.1826 |
| M11 | 9.88 | Poncirin | 594.6 | 593.1870[M-H]- | 1.5 | C28H34O14 | 177.4253,328.0950,428.3119,565.3489 |

**Table S4** Quantitativeanalytical results of QAFF by HPLC analysis

| **Compounds** | **Contents （mg/g）** | **Total content in QAFF（%）** |
| --- | --- | --- |
| Narirutin | 42.2 | 78.8 |
| Naringin | 361.0 |
| Hesperidin | 32.8 |
| Neohesperidin | 353.0 |

**Table S5** Significantly differential genes between QAFF-L and DSS

| **gene_id** | **Fold Change** | **log2**  **Fold Change** | **p-value** | **q-value** | **Regulation** |
| --- | --- | --- | --- | --- | --- |
| Trpv6 | 639.676 | 9.321 | 0.000 | 0.000 | Up |
| Vwa2 | 21.485 | 4.425 | 0.000 | 0.020 | Up |
| Khdc1a | 17.549 | 4.133 | 0.000 | 0.000 | Up |
| Gata4 | 16.266 | 4.024 | 0.000 | 0.025 | Up |
| Ly6g6c | 13.612 | 3.767 | 0.000 | 0.004 | Up |
| Fut9 | 10.175 | 3.347 | 0.000 | 0.012 | Up |
| Lrr1 | 5.203 | 2.379 | 0.000 | 0.001 | Up |
| Rmi2 | 5.165 | 2.369 | 0.000 | 0.025 | Up |
| Pdzd7 | 4.996 | 2.321 | 0.000 | 0.000 | Up |
| Tfrc | 4.652 | 2.218 | 0.000 | 0.010 | Up |
| Bub1 | 4.160 | 2.057 | 0.000 | 0.015 | Up |
| Hells | 3.851 | 1.945 | 0.000 | 0.020 | Up |
| Fancb | 3.641 | 1.864 | 0.000 | 0.000 | Up |
| Kif18a | 3.501 | 1.808 | 0.000 | 0.020 | Up |
| Zfp820 | 3.384 | 1.759 | 0.000 | 0.000 | Up |
| Cip2a | 3.191 | 1.674 | 0.000 | 0.013 | Up |
| Cdc6 | 3.121 | 1.642 | 0.000 | 0.006 | Up |
| Cep55 | 3.106 | 1.635 | 0.000 | 0.003 | Up |
| 2810408I11Rik | 3.076 | 1.621 | 0.000 | 0.001 | Up |
| Brca1 | 3.067 | 1.617 | 0.000 | 0.006 | Up |
| Gm32856 | 2.959 | 1.565 | 0.000 | 0.022 | Up |
| E2f7 | 2.917 | 1.544 | 0.000 | 0.009 | Up |
| Ciita | 2.914 | 1.543 | 0.000 | 0.000 | Up |
| Mns1 | 2.864 | 1.518 | 0.000 | 0.000 | Up |
| Gins1 | 2.669 | 1.416 | 0.000 | 0.016 | Up |
| Pole2 | 2.606 | 1.382 | 0.000 | 0.009 | Up |
| Smc2 | 2.497 | 1.320 | 0.000 | 0.050 | Up |
| Ncapg2 | 2.276 | 1.187 | 0.000 | 0.000 | Up |
| Rrm2 | 2.263 | 1.179 | 0.000 | 0.032 | Up |
| Mms22l | 2.213 | 1.146 | 0.000 | 0.048 | Up |
| D17H6S56E-5 | 2.203 | 1.139 | 0.000 | 0.004 | Up |
| Dna2 | 2.166 | 1.115 | 0.000 | 0.025 | Up |
| Gemin6 | 2.129 | 1.090 | 0.000 | 0.040 | Up |
| Atad5 | 2.113 | 1.079 | 0.000 | 0.000 | Up |
| Gdpd2 | 0.468 | -1.096 | 0.000 | 0.017 | Down |
| 1110025M09Rik | 0.445 | -1.169 | 0.000 | 0.024 | Down |
| Cldn5 | 0.422 | -1.245 | 0.000 | 0.022 | Down |
| Zkscan4 | 0.415 | -1.267 | 0.000 | 0.035 | Down |
| Lrrc17 | 0.381 | -1.392 | 0.000 | 0.009 | Down |
| Megf6 | 0.370 | -1.434 | 0.000 | 0.022 | Down |
| Fabp4 | 0.365 | -1.456 | 0.000 | 0.010 | Down |
| Agt | 0.358 | -1.482 | 0.000 | 0.008 | Down |
| Adra1a | 0.354 | -1.498 | 0.000 | 0.050 | Down |
| Smtnl2 | 0.347 | -1.527 | 0.000 | 0.000 | Down |
| Gm45998 | 0.339 | -1.560 | 0.000 | 0.036 | Down |
| Cyp1b1 | 0.339 | -1.562 | 0.000 | 0.017 | Down |
| Obscn | 0.326 | -1.616 | 0.000 | 0.024 | Down |
| 4833419F23Rik | 0.325 | -1.623 | 0.000 | 0.050 | Down |
| Asb4 | 0.317 | -1.658 | 0.000 | 0.032 | Down |
| Mamdc2 | 0.312 | -1.678 | 0.000 | 0.022 | Down |
| Naalad2 | 0.312 | -1.680 | 0.000 | 0.000 | Down |
| Lmo1 | 0.312 | -1.680 | 0.000 | 0.004 | Down |
| Ptpn5 | 0.310 | -1.688 | 0.000 | 0.026 | Down |
| Gpihbp1 | 0.308 | -1.699 | 0.000 | 0.001 | Down |
| Igfbp3 | 0.289 | -1.791 | 0.000 | 0.002 | Down |
| Depp1 | 0.286 | -1.806 | 0.000 | 0.008 | Down |
| Emilin3 | 0.266 | -1.912 | 0.000 | 0.018 | Down |
| Galnt15 | 0.265 | -1.916 | 0.000 | 0.009 | Down |
| Hlf | 0.261 | -1.938 | 0.000 | 0.009 | Down |
| Kcna5 | 0.258 | -1.957 | 0.000 | 0.009 | Down |
| Mrap | 0.239 | -2.063 | 0.000 | 0.024 | Down |
| Nrip2 | 0.237 | -2.077 | 0.000 | 0.002 | Down |
| Gm39529 | 0.217 | -2.201 | 0.000 | 0.015 | Down |
| Rbm11 | 0.210 | -2.252 | 0.000 | 0.020 | Down |
| Tmem252 | 0.207 | -2.275 | 0.000 | 0.043 | Down |
| Scn4b | 0.204 | -2.297 | 0.000 | 0.037 | Down |
| 9030612E09Rik | 0.193 | -2.371 | 0.000 | 0.006 | Down |
| Lvrn | 0.108 | -3.208 | 0.000 | 0.003 | Down |

**Table S6** KEGG pathway enrichment of differential gene between QAFF-L and DSS

| **Term** | **List Hits** | **Pop Hits** | **p-value** | **q-value** | **Enrichment score** |
| --- | --- | --- | --- | --- | --- |
| Pathways in cancer | 1.000 | 542.000 | 0.771 | 0.771 | 0.702 |
| Neuroactive ligand-receptor interaction | 2.000 | 391.000 | 0.274 | 0.368 | 1.947 |
| PI3K-Akt signaling pathway | 1.000 | 359.000 | 0.619 | 0.628 | 1.060 |
| MAPK signaling pathway | 1.000 | 294.000 | 0.545 | 0.560 | 1.295 |
| Endocytosis | 1.000 | 266.000 | 0.509 | 0.531 | 1.431 |
| Calcium signaling pathway | 1.000 | 240.000 | 0.473 | 0.501 | 1.586 |
| Chemical carcinogenesis - reactive oxygen species | 1.000 | 222.000 | 0.447 | 0.480 | 1.714 |
| Transcriptional misregulation in cancer | 1.000 | 217.000 | 0.439 | 0.480 | 1.754 |
| Diabetic cardiomyopathy | 1.000 | 210.000 | 0.428 | 0.475 | 1.812 |
| Chemical carcinogenesis - receptor activation | 2.000 | 209.000 | 0.103 | 0.304 | 3.642 |
| Tuberculosis | 1.000 | 179.000 | 0.379 | 0.427 | 2.126 |
| Cellular senescence | 2.000 | 178.000 | 0.079 | 0.304 | 4.277 |
| Phagosome | 1.000 | 175.000 | 0.372 | 0.426 | 2.175 |
| Cell adhesion molecules | 1.000 | 174.000 | 0.370 | 0.426 | 2.187 |
| cGMP-PKG signaling pathway | 2.000 | 173.000 | 0.075 | 0.304 | 4.400 |
| Influenza A | 1.000 | 168.000 | 0.360 | 0.426 | 2.266 |
| Tight junction | 2.000 | 166.000 | 0.070 | 0.304 | 4.586 |
| Cushing syndrome | 2.000 | 162.000 | 0.067 | 0.304 | 4.699 |
| Hepatitis C | 1.000 | 162.000 | 0.350 | 0.421 | 2.349 |
| MicroRNAs in cancer | 2.000 | 162.000 | 0.067 | 0.304 | 4.699 |
| Adrenergic signaling in cardiomyocytes | 3.000 | 156.000 | 0.008 | 0.179 | 7.319 |
| Phospholipase D signaling pathway | 1.000 | 149.000 | 0.327 | 0.400 | 2.554 |
| Ubiquitin mediated proteolysis | 1.000 | 147.000 | 0.323 | 0.400 | 2.589 |
| Breast cancer | 1.000 | 147.000 | 0.323 | 0.400 | 2.589 |
| Vascular smooth muscle contraction | 2.000 | 143.000 | 0.054 | 0.304 | 5.323 |
| Purine metabolism | 1.000 | 134.000 | 0.299 | 0.386 | 2.840 |
| AMPK signaling pathway | 1.000 | 127.000 | 0.286 | 0.376 | 2.997 |
| Cell cycle | 2.000 | 125.000 | 0.042 | 0.304 | 6.090 |
| Oocyte meiosis | 1.000 | 121.000 | 0.274 | 0.368 | 3.146 |
| Thyroid hormone signaling pathway | 1.000 | 120.000 | 0.272 | 0.368 | 3.172 |
| Leukocyte transendothelial migration | 1.000 | 117.000 | 0.266 | 0.368 | 3.253 |
| Growth hormone synthesis, secretion and action | 1.000 | 117.000 | 0.266 | 0.368 | 3.253 |
| HIF-1 signaling pathway | 1.000 | 114.000 | 0.261 | 0.368 | 3.339 |
| Insulin resistance | 1.000 | 110.000 | 0.253 | 0.368 | 3.460 |
| Toxoplasmosis | 1.000 | 109.000 | 0.251 | 0.368 | 3.492 |
| Aldosterone synthesis and secretion | 1.000 | 102.000 | 0.237 | 0.368 | 3.731 |
| AGE-RAGE signaling pathway in diabetic complications | 1.000 | 101.000 | 0.235 | 0.368 | 3.768 |
| Dilated cardiomyopathy | 1.000 | 94.000 | 0.220 | 0.363 | 4.049 |
| Steroid hormone biosynthesis | 1.000 | 93.000 | 0.218 | 0.363 | 4.093 |
| Drug metabolism - other enzymes | 1.000 | 92.000 | 0.216 | 0.363 | 4.137 |
| Hematopoietic cell lineage | 1.000 | 92.000 | 0.216 | 0.363 | 4.137 |
| Progesterone-mediated oocyte maturation | 1.000 | 92.000 | 0.216 | 0.363 | 4.137 |
| Hypertrophic cardiomyopathy | 1.000 | 91.000 | 0.214 | 0.363 | 4.183 |
| PPAR signaling pathway | 1.000 | 89.000 | 0.210 | 0.363 | 4.277 |
| Salivary secretion | 2.000 | 85.000 | 0.021 | 0.244 | 8.955 |
| Chemical carcinogenesis - DNA adducts | 1.000 | 84.000 | 0.199 | 0.363 | 4.531 |
| Antigen processing and presentation | 1.000 | 83.000 | 0.197 | 0.363 | 4.586 |
| Renin secretion | 1.000 | 75.000 | 0.180 | 0.363 | 5.075 |
| Metabolism of xenobiotics by cytochrome P450 | 1.000 | 73.000 | 0.175 | 0.363 | 5.214 |
| Glutathione metabolism | 1.000 | 72.000 | 0.173 | 0.363 | 5.286 |
| p53 signaling pathway | 2.000 | 72.000 | 0.015 | 0.214 | 10.572 |
| Cortisol synthesis and secretion | 2.000 | 72.000 | 0.015 | 0.214 | 10.572 |
| Ovarian steroidogenesis | 1.000 | 63.000 | 0.153 | 0.363 | 6.041 |
| Regulation of lipolysis in adipocytes | 1.000 | 57.000 | 0.140 | 0.342 | 6.677 |
| Pyrimidine metabolism | 1.000 | 56.000 | 0.137 | 0.342 | 6.797 |
| Mineral absorption | 1.000 | 54.000 | 0.133 | 0.342 | 7.048 |
| Tryptophan metabolism | 1.000 | 52.000 | 0.128 | 0.342 | 7.319 |
| Other types of O-glycan biosynthesis | 1.000 | 43.000 | 0.107 | 0.304 | 8.851 |
| Ferroptosis | 1.000 | 40.000 | 0.100 | 0.304 | 9.515 |
| Base excision repair | 1.000 | 36.000 | 0.091 | 0.304 | 10.572 |
| Renin-angiotensin system | 1.000 | 36.000 | 0.091 | 0.304 | 10.572 |
| Primary immunodeficiency | 1.000 | 36.000 | 0.091 | 0.304 | 10.572 |
| Mucin type O-glycan biosynthesis | 1.000 | 32.000 | 0.081 | 0.304 | 11.894 |
| Glycosphingolipid biosynthesis - lacto and neolacto series | 1.000 | 26.000 | 0.066 | 0.304 | 14.639 |
| Mannose type O-glycan biosynthesis | 1.000 | 23.000 | 0.059 | 0.304 | 16.548 |
| Glycosphingolipid biosynthesis - globo and isoglobo series | 1.000 | 16.000 | 0.041 | 0.304 | 23.788 |

**Table S7** Significantly differential genus between DSS and Ctrl by Wilcoxon algorithm

| **Taxon** | **P-value** | **Trends** |
| --- | --- | --- |
| *Alistipes* | 0.009 | Up |
| *Bacteroides* | 0.009 | Up |
| *Other* | 0.047 | Up |
| *Parabacteroides* | 0.009 | Up |
| *Oscillibacter* | 0.009 | Up |
| *Colidextribacter* | 0.009 | Up |
| *Clostridia_UCG-014* | 0.009 | Up |
| *[Eubacterium]_siraeum_group* | 0.016 | Up |
| *Escherichia-Shigella* | 0.009 | Up |
| *Ruminococcus* | 0.016 | Up |
| *Parasutterella* | 0.009 | Up |
| *UCG-003* | 0.009 | Up |
| *Incertae_Sedis* | 0.009 | Up |
| *Lachnospiraceae_UCG-006* | 0.028 | Up |
| *Faecalibaculum* | 0.008 | Up |
| *RF39* | 0.013 | Up |
| *UCG-009* | 0.016 | Up |
| *Bifidobacterium* | 0.045 | Up |
| *Akkermansia* | 0.005 | Up |
| *Harryflintia* | 0.016 | Up |
| *Turicibacter* | 0.019 | Up |
| *Romboutsia* | 0.034 | Up |
| *Muribaculaceae* | 0.009 | Down |
| *Lachnospiraceae_NK4A136_group* | 0.050 | Down |
| *Alloprevotella* | 0.009 | Down |
| *Muribaculum* | 0.008 | Down |
| *[Eubacterium]_coprostanoligenes_group* | 0.009 | Down |
| *Blautia* | 0.009 | Down |
| *Bilophila* | 0.016 | Down |
| *Intestinimonas* | 0.016 | Down |
| *[Eubacterium]_xylanophilum_group* | 0.005 | Down |
| *Monoglobus* | 0.016 | Down |
| *Anaerotruncus* | 0.008 | Down |
| *Marvinbryantia* | 0.019 | Down |
| *Roseburia* | 0.005 | Down |
| *Christensenellaceae_R-7_group* | 0.034 | Down |
| *Candidatus_Arthromitus* | 0.005 | Down |

**Table S8** Significantly differential genus between QAFF-L and DSS by Wilcoxon algorithm

| **Taxon** | **P-value** | **Trends** |
| --- | --- | --- |
| *Lachnospiraceae_NK4A136_group* | 0.050 | Up |
| *Alloprevotella* | 0.009 | Up |
| *NK4A214_group* | 0.047 | Up |
| *Prevotella* | 0.009 | Up |
| *Xanthomonas* | 0.028 | Up |
| *Paludicola* | 0.047 | Up |
| *Enterobacter* | 0.005 | Up |
| *Other* | 0.047 | Down |
| *Parabacteroides* | 0.009 | Down |
| *[Eubacterium]_siraeum_group* | 0.009 | Down |
| *Escherichia-Shigella* | 0.009 | Down |
| *UCG-003* | 0.047 | Down |
| *Faecalibaculum* | 0.026 | Down |
| *Intestinimonas* | 0.024 | Down |
| *Lactobacillus* | 0.009 | Down |
| *Lachnospiraceae_FCS020_group* | 0.028 | Down |
| *Bifidobacterium* | 0.047 | Down |
| *Akkermansia* | 0.005 | Down |
| *Harryflintia* | 0.047 | Down |

**Table S9** Significantly differential genus between 5-ASA and DSS by Wilcoxon algorithm

| **Taxon** | **P-value** | **Trends** |
| --- | --- | --- |
| *Lachnospiraceae_NK4A136_group* | 0.034 | Up |
| *[Eubacterium]_coprostanoligenes_group* | 0.028 | Up |
| *Bilophila* | 0.009 | Up |
| *Monoglobus* | 0.047 | Up |
| *Negativibacillus* | 0.019 | Up |
| *Bacteroides* | 0.028 | Down |
| *Parabacteroides* | 0.016 | Down |
| *Escherichia-Shigella* | 0.009 | Down |
| *UCG-003* | 0.047 | Down |

**Table S10** Common significantly differential genus between DSS VS Ctrl and QAFF-L VS DSS

| **Taxon** | **Trends of**  **DSS VS Ctrl** | **Trends of**  **QAFF-L VS DSS** |
| --- | --- | --- |
| *Other* | Up | Down |
| *Parabacteroides* | Up | Down |
| *[Eubacterium]_siraeum_group* | Up | Down |
| *Escherichia-Shigella* | Up | Down |
| *UCG-003* | Up | Down |
| *Faecalibaculum* | Up | Down |
| *Bifidobacterium* | Up | Down |
| *Akkermansia* | Up | Down |
| *Harryflintia* | Up | Down |
| *Lachnospiraceae_NK4A136_group* | Down | Up |
| *Alloprevotella* | Down | Up |
| *Intestinimonas* | Down | Down |

**Table S11** Common significantly differential genus between DSS VS Ctrl and 5-ASA VS DSS

| **Taxon** | **Trends of**  **DSS VS Ctrl** | **Trends of**  **5-ASA VS DSS** |
| --- | --- | --- |
| *Bacteroides* | Up | Down |
| *Parabacteroides* | Up | Down |
| *Escherichia-Shigella* | Up | Down |
| *UCG-003* | Up | Down |
| *Lachnospiraceae_NK4A136_group* | Down | Up |
| *[Eubacterium]_coprostanoligenes_group* | Down | Up |
| *Bilophila* | Down | Up |
| *Monoglobus* | Down | Up |

**Table S12** Common significantly differential genus between DSS VS Ctrl, QAFF-L VS DSS, and 5-ASA VS DSS

| **Taxon** | **Trends of**  **DSS VS Ctrl** | **Trends of**  **QAFF-L VS DSS** | **Trends of**  **5-ASA VS DSS** |
| --- | --- | --- | --- |
| *Parabacteroides* | Up | Down | Down |
| *Escherichia-Shigella* | Up | Down | Down |
| *UCG-003* | Up | Down | Down |
| *Lachnospiraceae_NK4A136_group* | Down | Up | Up |

**Table S13** Significantly differential biomarkers by linear discriminant analysis coupled with effect size measurements (LEfSe) from phylum to genus

| **Biomarker** | **Logarithm value** | **Groups** | **LDA value** | ***P*-value** |
| --- | --- | --- | --- | --- |
| *k__Bacteria.p__Firmicutes.c__Clostridia.o__Clostridiales* | 2.489 | Ctrl | 3.031 | 0.019 |
| *k__Bacteria.p__Bacteroidota* | 5.800 | Ctrl | 4.858 | 0.043 |
| *k__Bacteria.p__Firmicutes.c__Clostridia.o__Clostridiales.f__Clostridiaceae* | 2.489 | Ctrl | 3.032 | 0.019 |
| *k__Bacteria.p__Bacteroidota.c__Bacteroidia* | 5.800 | Ctrl | 4.858 | 0.043 |
| *k__Bacteria.p__Bacteroidota.c__Bacteroidia.o__Bacteroidales.f__Muribaculaceae.g__Muribaculum* | 4.293 | Ctrl | 4.042 | 0.034 |
| *k__Bacteria.p__Firmicutes.c__Clostridia.o__Oscillospirales.f___Eubacterium__coprostanoligenes_group.g___Eubacterium__coprostanoligenes_group* | 3.855 | Ctrl | 3.392 | 0.011 |
| *k__Bacteria.p__Firmicutes.c__Clostridia.o__Lachnospirales.f__Lachnospiraceae.g___Eubacterium__xylanophilum_group* | 3.620 | Ctrl | 3.427 | 0.000 |
| *k__Bacteria.p__Firmicutes.c__Clostridia.o__Clostridiales.f__Clostridiaceae.g__Candidatus_Arthromitus* | 2.489 | Ctrl | 3.431 | 0.003 |
| *k__Bacteria.p__Bacteroidota.c__Bacteroidia.o__Bacteroidales.f__Muribaculaceae.g__Muribaculaceae* | 5.653 | Ctrl | 4.951 | 0.009 |
| *k__Bacteria.p__Bacteroidota.c__Bacteroidia.o__Bacteroidales.f__Muribaculaceae* | 5.672 | Ctrl | 5.001 | 0.006 |
| *k__Bacteria.p__Firmicutes.c__Clostridia.o__Lachnospirales.f__Lachnospiraceae.g__A2* | 2.684 | Ctrl | 3.411 | 0.019 |
| *k__Bacteria.p__Bacteroidota.c__Bacteroidia.o__Bacteroidales* | 5.800 | Ctrl | 4.859 | 0.043 |
| *k__Bacteria.p__Firmicutes.c__Clostridia.o__Oscillospirales.f__UCG_010* | 3.559 | Ctrl | 3.127 | 0.009 |
| *k__Bacteria.p__Firmicutes.c__Clostridia.o__Oscillospirales.f__UCG_010.g__UCG_010* | 3.559 | Ctrl | 3.127 | 0.009 |
| *k__Bacteria.p__Firmicutes.c__Clostridia.o__Lachnospirales.f__Lachnospiraceae.g__Lachnospiraceae_UCG_001* | 3.208 | Ctrl | 3.004 | 0.019 |
| *k__Bacteria.p__Desulfobacterota.c__Desulfovibrionia.o__Desulfovibrionales.f__Desulfovibrionaceae.g__Desulfovibrio* | 3.823 | Ctrl | 3.416 | 0.043 |
| *k__Bacteria.p__Firmicutes.c__Clostridia.o__Lachnospirales.f__Lachnospiraceae.g__Blautia* | 4.140 | Ctrl | 3.785 | 0.010 |
| *k__Bacteria.p__Firmicutes.c__Clostridia.o__Lachnospirales.f__Lachnospiraceae.g__Marvinbryantia* | 3.234 | Ctrl | 3.142 | 0.003 |
| *k__Bacteria.p__Firmicutes.c__Clostridia.o__Oscillospirales.f___Eubacterium__coprostanoligenes_group* | 3.855 | Ctrl | 3.392 | 0.011 |
| *k__Bacteria.p__Firmicutes.c__Clostridia.o__Clostridia_UCG_014.f__Clostridia_UCG_014* | 4.382 | DSS | 4.007 | 0.013 |
| *k__Bacteria.p__Firmicutes.c__Clostridia.o__Oscillospirales.f__Ruminococcaceae.g___Eubacterium__siraeum_group* | 4.339 | DSS | 3.954 | 0.018 |
| *k__Bacteria.p__Firmicutes.c__Clostridia.o__Clostridia_UCG_014* | 4.382 | DSS | 4.007 | 0.013 |
| *k__Bacteria.p__Proteobacteria.c__Gammaproteobacteria.o__Enterobacterales.f__Enterobacteriaceae* | 4.424 | DSS | 4.126 | 0.001 |
| *k__Bacteria.p__Proteobacteria.c__Alphaproteobacteria.o__Rhodospirillales* | 3.867 | DSS | 3.492 | 0.006 |
| *k__Bacteria.p__Firmicutes.c__Clostridia.o__Clostridia_UCG_014.f__Clostridia_UCG_014.g__Clostridia_UCG_014* | 4.382 | DSS | 4.007 | 0.013 |
| *k__Bacteria.p__Proteobacteria* | 4.627 | DSS | 4.299 | 0.001 |
| *k__Bacteria.p__Bacteroidota.c__Bacteroidia.o__Bacteroidales.f__Tannerellaceae.g__Parabacteroides* | 4.697 | DSS | 4.304 | 0.010 |
| *k__Bacteria.p__Bacteroidota.c__Bacteroidia.o__Bacteroidales.f__Tannerellaceae* | 4.697 | DSS | 4.304 | 0.010 |
| *k__Bacteria.p__Proteobacteria.c__Gammaproteobacteria.o__Burkholderiales* | 3.901 | DSS | 3.547 | 0.009 |
| *k__Bacteria.p__Firmicutes.c__Clostridia.o__Peptostreptococcales_Tissierellales* | 3.077 | DSS | 3.017 | 0.010 |
| *k__Bacteria.p__Proteobacteria.c__Gammaproteobacteria.o__Burkholderiales.f__Sutterellaceae.g__Parasutterella* | 3.900 | DSS | 3.547 | 0.009 |
| *k__Bacteria.p__Firmicutes.c__Clostridia.o__Oscillospirales.f__Oscillospiraceae.g__UCG_003* | 3.823 | DSS | 3.335 | 0.026 |
| *k__Bacteria.p__Firmicutes.c__Clostridia.o__Oscillospirales.f__Oscillospiraceae* | 4.931 | DSS | 4.194 | 0.023 |
| *k__Bacteria.p__Firmicutes.c__Bacilli.o__Erysipelotrichales.f__Erysipelotrichaceae.g__Faecalibaculum* | 3.651 | DSS | 3.335 | 0.009 |
| *k__Bacteria.p__Bacteroidota.c__Bacteroidia.o__Bacteroidales.f__Bacteroidaceae.g__Bacteroides* | 4.829 | DSS | 4.279 | 0.007 |
| *k__Bacteria.p__Bacteroidota.c__Bacteroidia.o__Bacteroidales.f__Bacteroidaceae* | 4.829 | DSS | 4.279 | 0.007 |
| *k__Bacteria.p__Firmicutes.c__Clostridia.o__Oscillospirales* | 5.099 | DSS | 4.291 | 0.008 |
| *k__Bacteria.p__Proteobacteria.c__Gammaproteobacteria* | 4.544 | DSS | 4.226 | 0.002 |
| *k__Bacteria.p__Proteobacteria.c__Gammaproteobacteria.o__Burkholderiales.f__Sutterellaceae* | 3.901 | DSS | 3.545 | 0.009 |
| *k__Bacteria.p__Firmicutes.c__Clostridia.o__Oscillospirales.f__Oscillospiraceae.g__Oscillibacter* | 4.470 | DSS | 3.967 | 0.029 |
| *k__Bacteria.p__Proteobacteria.c__Gammaproteobacteria.o__Enterobacterales.f__Enterobacteriaceae.g__Escherichia_Shigella* | 4.420 | DSS | 4.124 | 0.005 |
| *k__Bacteria.p__Proteobacteria.c__Alphaproteobacteria* | 3.869 | DSS | 3.494 | 0.006 |
| *k__Bacteria.p__Firmicutes.c__Clostridia.o__Oscillospirales.f__Ruminococcaceae* | 4.527 | DSS | 3.980 | 0.003 |
| *k__Bacteria.p__Proteobacteria.c__Gammaproteobacteria.o__Enterobacterales* | 4.426 | DSS | 4.128 | 0.002 |
| *k__Bacteria.p__Proteobacteria.c__Gammaproteobacteria.o__Enterobacterales.f__Enterobacteriaceae.g__Enterobacter* | 2.863 | QAFF-L | 3.056 | 0.002 |
| *k__Bacteria.p__Bacteroidota.c__Bacteroidia.o__Bacteroidales.f__Prevotellaceae.g__Alloprevotella* | 4.996 | QAFF-L | 4.682 | 0.002 |
| *k__Bacteria.p__Desulfobacterota.c__Desulfovibrionia* | 4.426 | QAFF-L | 3.836 | 0.035 |
| *k__Bacteria.p__Desulfobacterota.c__Desulfovibrionia.o__Desulfovibrionales.f__Desulfovibrionaceae* | 4.426 | QAFF-L | 3.836 | 0.035 |
| *k__Bacteria.p__Firmicutes.c__Negativicutes* | 1.892 | QAFF-L | 3.487 | 0.011 |
| *k__Bacteria.p__Firmicutes.c__Negativicutes.o__Veillonellales_Selenomonadales* | 1.892 | QAFF-L | 3.489 | 0.011 |
| *k__Bacteria.p__Bacteroidota.c__Bacteroidia.o__Bacteroidales.f__Prevotellaceae* | 5.097 | QAFF-L | 4.753 | 0.012 |
| *k__Bacteria.p__Desulfobacterota* | 4.426 | QAFF-L | 3.836 | 0.035 |
| *k__Bacteria.p__Desulfobacterota.c__Desulfovibrionia.o__Desulfovibrionales* | 4.426 | QAFF-L | 3.836 | 0.035 |
| *k__Bacteria.p__Firmicutes.c__Clostridia.o__Oscillospirales.f__Butyricicoccaceae.g__UCG_009* | 2.888 | 5-ASA | 3.009 | 0.016 |
| *k__Bacteria.p__Bacteroidota.c__Bacteroidia.o__Bacteroidales.f__Rikenellaceae* | 4.898 | 5-ASA | 4.182 | 0.038 |
| *k__Bacteria.p__Desulfobacterota.c__Desulfovibrionia.o__Desulfovibrionales.f__Desulfovibrionaceae.g__Bilophila* | 3.589 | 5-ASA | 3.125 | 0.013 |
| *k__Bacteria.p__Verrucomicrobiota.c__Verrucomicrobiae.o__Verrucomicrobiales.f__Akkermansiaceae* | 2.764 | 5-ASA | 3.107 | 0.001 |
| *k__Bacteria.p__Firmicutes.c__Clostridia* | 5.566 | 5-ASA | 4.814 | 0.009 |
| *k__Bacteria.p__Firmicutes.c__Clostridia.o__Oscillospirales.f__Ruminococcaceae.g__Incertae_Sedis* | 3.745 | 5-ASA | 3.306 | 0.009 |
| *k__Bacteria.p__Verrucomicrobiota* | 2.764 | 5-ASA | 3.107 | 0.001 |
| *k__Bacteria.p__Firmicutes* | 5.571 | 5-ASA | 4.816 | 0.010 |
| *k__Bacteria.p__Bacteroidota.c__Bacteroidia.o__Bacteroidales.f__Rikenellaceae.g__Alistipes* | 4.830 | 5-ASA | 4.236 | 0.011 |
| *k__Bacteria.p__Verrucomicrobiota.c__Verrucomicrobiae.o__Verrucomicrobiales* | 2.764 | 5-ASA | 3.107 | 0.001 |
| *k__Bacteria.p__Firmicutes.c__Clostridia.o__Oscillospirales.f__Butyricicoccaceae* | 3.511 | 5-ASA | 3.143 | 0.023 |
| *k__Bacteria.p__Verrucomicrobiota.c__Verrucomicrobiae.o__Verrucomicrobiales.f__Akkermansiaceae.g__Akkermansia* | 2.764 | 5-ASA | 3.107 | 0.001 |
| *k__Bacteria.p__Verrucomicrobiota.c__Verrucomicrobiae* | 2.764 | 5-ASA | 3.107 | 0.001 |

**Table S14** Differential metabolites between DSS and Ctrl groups

| **Metabolites** | **Compound ID** | **log2 (FC)** |
| --- | --- | --- |
| Naftidrofuryl | HMDB0255425 | 5.88 |
| N-(17,18-Epoxy-5z,8z,11z,14z-Eicosatetraenoyl)-Ethanolamine | NA | 5.04 |
| 11,14-Eicosadienoic Acid | NA | 4.06 |
| 3alpha-Hydroxytibolone | HMDB0246255 | 3.70 |
| Furanoid Acid - F6 | HMDB0031126 | 3.68 |
| 13s,14s-Epoxy-Maresin | NA | 3.58 |
| 3alpha,5beta,7alpha,12alpha-Tetrahydroxycholan-24-Oic Acid | NA | 3.03 |
| PC(20:3(8Z,11Z,14Z)/18:1(11Z)) | HMDB0008400 | 2.95 |
| Cinobufagin | NA | 2.94 |
| Resolvin D5 | HMDB0004038 | 2.90 |
| 11-Dehydro-Txb3 | NA | 2.80 |
| Threonylglutamic Acid | HMDB0029060 | 2.75 |
| Fapy-Adenine | HMDB0004816 | 2.68 |
| Methylcellulose | HMDB0254627 | 2.57 |
| 13s-Hpode | HMDB0003871 | 2.43 |
| Nicotinic Acid | HMDB0001488 | 2.42 |
| 11,12-Epoxy-8-Hydroxyeicosa-5,9,14-Trienoic Acid | HMDB0004688 | 2.41 |
| PC(18:0/P-18:1(11Z)) | HMDB0008062 | 2.39 |
| (9s,13s)-10,11-Dihydro-12-Oxo-15-Phytoenoic Acid | HMDB0301805 | 2.35 |
| 5beta-Cyprinolsulfate | HMDB06888 | 2.34 |
| Prasugrel | HMDB0015625 | 2.30 |
| Thymidine | HMDB0000273 | 2.26 |
| Uric Acid | HMDB0000289 | 2.25 |
| Ingenol Mebutate | NA | 2.25 |
| Graminoxin A1 | NA | 2.19 |
| 5-Hydroxyindole Thiazolidine Carboxylate | HMDB0304217 | 2.18 |
| (22e,24r)-3beta,5alpha-Dihydroxy-14beta,15beta-Epoxyergosta-7,22-Diene-6-One | NA | 2.18 |
| 3a,21-Dihydroxy-5b-Pregnane-11,20-Dione | HMDB0006755 | 2.17 |
| Isonicotinic Acid | HMDB0060665 | 2.15 |
| 2-Deoxy-20-Hydroxy-5alpha-Ecdysone 3-Acetate | NA | 2.15 |
| Bisphenol Af | HMDB0249276 | 2.14 |
| 1,2-Ethanediol Monoricinoleate | HMDB0252073 | 2.13 |
| PI(O-16:0/0:0) | NA | 2.10 |
| Hecogenin Acetate | NA | 2.07 |
| Resolvin T3 | NA | 2.05 |
| Cyanidin 3-O-(6''-Malonyl-Arabinoside) | HMDB0029243 | 2.05 |
| DG(19:0/6 keto-PGF1alpha/0:0) | HMDB0296079 | 2.05 |
| 2-[1-(2-Fluorophenyl)Ethylamino]-5-Methyl-5-(Trifluoromethyl)-1,3-Thiazol-4-One | HMDB0257685 | 2.02 |
| 12-Oxo-Ete | HMDB0013633 | 2.01 |
| Anordiol | HMDB0248450 | 2.00 |
| 21-Hdha | NA | 1.92 |
| PC(20:0/18:3(9Z,12Z,15Z)) | HMDB0008272 | 1.85 |
| O-Butanoyl-Carnitine | HMDB0002013 | 1.82 |
| Ubiquinol-9 | HMDB0259381 | 1.76 |
| Uric Acid Lactate | HMDB0259719 | 1.76 |
| Leiopathic Acid | NA | 1.74 |
| N-Stearoyl Cysteine | HMDB0241940 | 1.74 |
| PS(O-16:0/19:0) | NA | 1.71 |
| Comptonin | NA | 1.70 |
| Diethyl Disulfide | HMDB0029572 | 1.67 |
| (25r)-12alpha-Hydroxy-24r,26r-Dimethyl-26,27-Cyclo-Cholest-4-En-3,6-Dione | NA | 1.56 |
| D-Alanyl Glycine | HMDB0302832 | 1.51 |
| Cysteine-Glutathione Disulfide | HMDB0250707 | 1.49 |
| 6-Aminomethyl-3-Methyl-4h-1,2,4-Benzothiadiazine 1,1-Dioxide | HMDB0248281 | 1.48 |
| PS(O-18:0/17:0) | NA | 1.34 |
| Pyroglutamic Acid | HMDB0000267 | 1.34 |
| Cytidine Monophosphate | HMDB0000095 | 1.34 |
| PE(22:6(4Z,7Z,10Z,13Z,16Z,19Z)/21:0) | NA | 1.32 |
| Cytosine | HMDB0000630 | 1.32 |
| PC(O-18:0/18:4(6Z,9Z,12Z,15Z)) | HMDB0304651 | 1.32 |
| Thiophanate-Methyl | HMDB0259025 | 1.25 |
| PC(O-16:0/18:3(6Z,9Z,12Z)) | HMDB0304658 | 1.19 |
| PE(19:0/16:0) | NA | 1.13 |
| PS(O-20:0/22:6(4Z,7Z,10Z,13Z,16Z,19Z)) | NA | 1.11 |
| SM(d18:0/16:1(9Z)) | HMDB0013464 | 1.10 |
| 15-Deoxyprostaglandin J2 | HMDB0244664 | 1.07 |
| PE(20:2(11Z,14Z)/19:0) | NA | 1.03 |
| PC(P-18:1(11Z)/22:5(4Z,7Z,10Z,13Z,19Z)-O(16,17)) | HMDB0289719 | 1.02 |
| 4-Trimethylammoniobutanoic Acid | HMDB0001161 | 0.99 |
| Pgd2 | HMDB0001403 | 0.98 |
| 13,14-Dihydro-15-Keto Prostaglandin J2 | NA | 0.98 |
| PC(20:2(11Z,14Z)/16:0) | HMDB0008331 | 0.97 |
| (+/-)-8-Hydroxy-5z,9e,11z,14z,17z-Eicosapentaenoic Acid | HMDB0242271 | 0.96 |
| PE-NMe2(16:0/20:4(8Z,11Z,14Z,17Z)) | HMDB0116711 | 0.93 |
| PA(22:4(7Z,10Z,13Z,16Z)/19:1(9Z)) | NA | 0.90 |
| Pgj2 | HMDB0002710 | 0.89 |
| 9,10,18-Trihome(12) | NA | 0.89 |
| Pyrrolidone Carboxylic Acid | HMDB0257001 | 0.88 |
| 8s-Hode | NA | 0.81 |
| 11r-Hede | NA | 0.81 |
| PE-Cer(d15:1(4E)/22:0(2OH)) | NA | 0.79 |
| PC(18:1(11Z)/22:6(4Z,7Z,10Z,13Z,16Z,19Z)) | HMDB0008090 | 0.73 |
| 20-Hydroxy-Pgf2alpha | HMDB04049 | 0.71 |
| Delta-12-Pgj2 | HMDB0004238 | 0.71 |
| Stearoylcarnitine | HMDB0000848 | 0.70 |
| Xanthine | HMDB0000292 | 0.69 |
| 17(S)-Hete | NA | 0.67 |
| PC(18:3(9Z,12Z,15Z)/20:3(8Z,11Z,14Z)) | HMDB0008212 | 0.66 |
| 5-Trans Prostaglandin D2 | NA | 0.66 |
| 16-Phenyl Tetranor Prostaglandin E1 | NA | 0.61 |
| PA(P-18:0/22:6(4Z,7Z,10Z,13Z,16Z,19Z)) | NA | 0.61 |
| Xanthosine | HMDB0000299 | 0.61 |
| PE(P-18:0/20:4(5Z,8Z,11Z,14Z)) | HMDB0005779 | 0.59 |
| PC(P-18:1(11Z)/16:0) | HMDB0011272 | 0.49 |
| PS(O-18:0/19:1(9Z)) | NA | 0.37 |
| 1-(8-[5]-Ladderane-Octanyl)-2-(8-[3]-Ladderane-Octanyl)-Sn-Glycero-3-Phospho-(1'-Sn-Glycerol) | NA | 0.23 |
| Oscr#3 | NA | -5.85 |
| Glycerophosphocholine | HMDB0000086 | -3.02 |
| CerP(d18:1/8:0) | NA | -2.96 |
| PC(16:0/3:1(2E)) | NA | -2.70 |
| 2-Lysophosphatidylcholine | HMDB0258493 | -2.70 |
| Susalimod | HMDB0258638 | -2.59 |
| Glutathione | HMDB0000125 | -2.59 |
| PC(0:0/18:1(9Z)) | HMDB0061701 | -2.40 |
| Lys-Gln-Ala-Gly-Asp-Val | NA | -2.28 |
| 1-O-Hexadecyl-Sn-Glycero-3-Phosphocholine | HMDB0243890 | -2.26 |
| Pkhdia-Pe | NA | -2.25 |
| Palmitoyl Serinol | HMDB0013654 | -2.19 |
| Letrozole | HMDB0015141 | -2.15 |
| PC(O-16:1(11Z)/0:0) | NA | -2.15 |
| Penaresidin A | NA | -2.11 |
| PC(O-16:1(3Z)/0:0) | NA | -2.08 |
| Icilin | NA | -2.06 |
| Glycerylphosphorylethanolamine | HMDB0000114 | -2.06 |
| Og-Pe | NA | -1.99 |
| Oob-Ps | NA | -1.99 |
| (2r)-2-{[(9z)-Hexadec-9-Enoyl]Oxy}-3-Hydroxypropyl 2-(Trimethylazaniumyl)Ethyl Phosphate | HMDB0245288 | -1.94 |
| Glycerophosphoinositol | HMDB0011649 | -1.94 |
| PS(10:0/10:0) | NA | -1.92 |
| Kanakugiol | NA | -1.90 |
| PC(2:0/PGJ2) | HMDB0288834 | -1.89 |
| PC(18:3(9Z,12Z,15Z)/0:0) | HMDB0010388 | -1.89 |
| PC(16:1(9Z)/0:0) | HMDB0010383 | -1.84 |
| PG(i-22:0/PGE2) | HMDB0272111 | -1.79 |
| PC(18:3(6Z,9Z,12Z)/0:0) | HMDB0010387 | -1.79 |
| PC(17:1(9Z)/0:0) | NA | -1.74 |
| PE(P-18:0/0:0) | HMDB0240598 | -1.73 |
| 1-(2-Methoxy-6z-Heptadecenyl)-Sn-Glycero-3-Phosphoethanolamine | NA | -1.71 |
| GM4(d18:1/16:0) | NA | -1.71 |
| PC(0:0/14:0) | NA | -1.69 |
| PS(12:0/13:0) | NA | -1.68 |
| Ohoha-Pa | NA | -1.67 |
| Heptulose | HMDB0302552 | -1.65 |
| PS(O-18:0/0:0) | NA | -1.64 |
| PC(15:0/0:0) | HMDB0010381 | -1.64 |
| PA(20:2(11Z,14Z)/0:0) | NA | -1.64 |
| PE(20:0/0:0) | HMDB0011511 | -1.52 |
| 4-Amino-8-(2-Fluoro-6-Methoxyphenyl)-N-Propylcinnoline-3-Carboxamide | HMDB0248777 | -1.52 |
| (10z)-Heptadec-10-Enoylcarnitine | HMDB0241517 | -1.52 |
| PC(O-18:1(10E)/2:0) | NA | -1.50 |
| Os-Pc | NA | -1.48 |
| PC(22:1(13Z)/0:0) | HMDB0010399 | -1.47 |
| PE(22:1(13Z)/0:0) | HMDB0011521 | -1.47 |
| PC(O-18:1(9Z)/0:0) | NA | -1.46 |
| 5'-Methylthioadenosine | HMDB0001173 | -1.45 |
| LysoPE(P-18:1(9Z)/0:0) | HMDB0240599 | -1.45 |
| PE(O-16:0/0:0) | NA | -1.43 |
| N1-(2-Methoxy-4-Methylbenzyl)-N2-(2-(Pyridin-2-Yl) Ethyl)Oxalamide | HMDB0032383 | -1.39 |
| 2,3-Epoxyaflatoxin B1 | HMDB0006558 | -1.37 |
| S-(11-Oh-9-Deoxy-Delta9,12-Pgd2)-Glutathione | HMDB0013056 | -1.36 |
| Palmitoyl Ara-C | HMDB0256087 | -1.34 |
| Glycerophosphoric Acid | HMDB0252849 | -1.33 |
| PC(O-16:0/0:0) | NA | -1.32 |
| (22e)-26,26,26,27,27,27-Hexafluoro-25-Hydroxy-22,23-Didehydrovitamin D3 | NA | -1.32 |
| PE(20:1(11Z)/0:0) | HMDB0011512 | -1.32 |
| PE(19:1(9Z)/0:0) | NA | -1.31 |
| Artefenomel | HMDB0248617 | -1.29 |
| PC(18:1(6Z)/0:0) | HMDB0256159 | -1.26 |
| GM4(d18:1/20:0) | NA | -1.21 |
| PG(16:0/0:0) | HMDB0240601 | -1.20 |
| Norsanguinarine | HMDB0030176 | -1.20 |
| Bisantrene | HMDB0249263 | -1.20 |
| PC(20:3(5Z,8Z,11Z)/0:0) | HMDB0010393 | -1.18 |
| PC(20:1(9Z)/0:0) | NA | -1.17 |
| PC(22:1(11Z)/0:0) | NA | -1.16 |
| 6z,9z,12z,15z,18z-Tetracosapentaenoic Acid | HMDB0006322 | -1.14 |
| S-Japonin | HMDB0035802 | -1.14 |
| Phosphoribosyl Formamidocarboxamide | HMDB0001439 | -1.13 |
| PE(17:1(9Z)/0:0) | NA | -1.11 |
| PI(18:2(9Z,12Z)/0:0) | HMDB0240597 | -1.11 |
| PE(0:0/18:1(11Z)) | HMDB0011475 | -1.10 |
| PC(2:0/5-iso PGF2VI) | HMDB0288846 | -1.10 |
| Oxidized Glutathione | HMDB0003337 | -1.09 |
| PC(P-18:1(9Z)/0:0) | HMDB0010408 | -1.08 |
| PC(16:0/0:0) | HMDB0010382 | -1.07 |
| PI(16:0/0:0) | HMDB0061695 | -1.02 |
| Amc Arachidonoyl Amide | NA | -1.00 |
| PC(2:0/PGF2alpha) | HMDB0288832 | -1.00 |
| PE(O-18:0/0:0) | NA | -0.99 |
| PE(18:1(9Z)/0:0) | HMDB0011506 | -0.99 |
| PC(17:0/0:0) | HMDB0012108 | -0.98 |
| Thioperamide | HMDB0259023 | -0.97 |
| PE(10:0/10:0) | NA | -0.95 |
| PS(O-20:0/0:0) | NA | -0.95 |
| PC(20:2(11Z,14Z)/0:0) | HMDB0010392 | -0.94 |
| PC(20:3(8Z,11Z,14Z)/0:0) | HMDB0010394 | -0.91 |
| 2-Hydroxyicosanoylcarnitine | HMDB0241568 | -0.90 |
| (R)-2-((S)-1,2-Dihydroxyethyl)-4,5-Dihydroxyfuran-3(2h)-One | HMDB0248912 | -0.90 |
| PE(18:1(11Z)/0:0) | HMDB0011505 | -0.89 |
| PE(20:2(11Z,14Z)/0:0) | HMDB0011513 | -0.89 |
| PE(P-16:0/0:0) | HMDB0011152 | -0.89 |
| 7-[(2-Benzyl-3-Sulfanylpropanoyl)Amino]Heptanoic Acid | HMDB0244471 | -0.88 |
| Hydroxyprolyl-Histidine | HMDB0028865 | -0.88 |
| Doxepin | NA | -0.85 |
| PC(O-18:0/0:0) | HMDB0011149 | -0.85 |
| Imidazolepropionic Acid | HMDB0002271 | -0.84 |
| LysoPC(0:0/18:2(9Z,12Z)) | HMDB0061700 | -0.84 |
| 10-Hydroxyamitriptyline | NA | -0.83 |
| PC(18:2(9Z,12Z)/0:0) | HMDB0010386 | -0.82 |
| Xylan | HMDB0301774 | -0.81 |
| Spermidine | HMDB0001257 | -0.81 |
| PE(17:0/0:0) | HMDB0061691 | -0.80 |
| Helilupolone | NA | -0.79 |
| Ribose 1-Phosphate | HMDB0001489 | -0.79 |
| 1-(2-Methoxy-14-Methyl-Pentadecanyl)-Sn-Glycero-3-Phosphoethanolamine | NA | -0.79 |
| PE(O-18:1(9Z)/0:0) | NA | -0.77 |
| Fad | HMDB0001248 | -0.77 |
| 2-O-Ethyl Paf C-16 | NA | -0.77 |
| (2s,5s,6r)-2,6-Cyclolycopene-1-Methoxy-5-Ol | NA | -0.77 |
| 2-(8-[3]-Ladderane-Octanyl)-Sn-Glycero-3-Phosphoethanolamine | NA | -0.76 |
| PC(18:0/0:0) | HMDB0010384 | -0.76 |
| PA(8:0/20:3(5Z,8Z,11Z)-O(14R,15S)) | HMDB0266583 | -0.76 |
| 3e,13e-Octadecadienyl Acetate | NA | -0.75 |
| Chemodosimeter | HMDB0250072 | -0.75 |
| PE(0:0/18:2(9Z,12Z)) | HMDB0011477 | -0.74 |
| Milbemycin Alpha10 | HMDB0254722 | -0.73 |
| PA(19:0/0:0) | HMDB0062322 | -0.72 |
| PS(20:4(5Z,8Z,11Z,14Z)/0:0) | NA | -0.72 |
| PE(0:0/16:0) | HMDB0011473 | -0.72 |
| Niacinamide | HMDB0001406 | -0.71 |
| Og-Pc | NA | -0.70 |
| PE(18:2(9Z,12Z)/0:0) | HMDB0011507 | -0.69 |
| Okhdia-Pe | NA | -0.68 |
| Erythronic Acid | HMDB0000613 | -0.68 |
| PE(16:0/0:0) | HMDB0011503 | -0.67 |
| Ohhdia-Pe | NA | -0.67 |
| Petroselinic Acid | HMDB0002080 | -0.66 |
| PC(20:4(5Z,8Z,11Z,14Z)/0:0) | HMDB0010395 | -0.61 |
| PE(18:3(6Z,9Z,12Z)/0:0) | HMDB0011508 | -0.61 |
| Podocarpic Acid | NA | -0.61 |
| Oleyl Arachidonate | NA | -0.60 |
| PC(22:5(4Z,7Z,10Z,13Z,16Z)/0:0) | HMDB0010402 | -0.58 |
| 3-Hexanoyl-Nbd Cholesterol | NA | -0.57 |
| 4z,9e,15e,19z-Docosatetraenoic Acid | NA | -0.57 |
| PE(0:0/20:3(11Z,14Z,17Z)) | HMDB0011484 | -0.56 |
| Lipoxin C4 | NA | -0.49 |
| 10-[5]-Ladderane-Decanoic Acid | NA | -0.37 |
| Cis-Epsilon-Octenoic Acid | NA | -0.37 |
| PE(20:4(5Z,8Z,11Z,14Z)/0:0) | HMDB0011517 | -0.31 |
| PC(P-16:0/22:6(5Z,7Z,10Z,13Z,16Z,19Z)-OH(4)) | HMDB0289501 | -0.31 |
| PI(18:1(9Z)/20:3(8Z,11Z,14Z)) | HMDB0009843 | -0.29 |
| PE(20:3(8Z,11Z,14Z)/0:0) | HMDB0011516 | -0.25 |
| 4-Dodecylbenzenesulfonic Acid | HMDB0059915 | -0.17 |
| 4-Methylimidazole | HMDB0246511 | -0.14 |

**Table S15** Differential metabolites between QAFF-L and DSS groups

| **Metabolites** | **Compound ID** | **log2 (FC)** |
| --- | --- | --- |
| Tri-Glyceride | HMDB0259133 | 3.70 |
| PC(O-20:0/14:1(9Z)) | NA | 2.92 |
| DG(a-25:0/PGE2/0:0) | HMDB0298150 | 2.86 |
| Lys-Gln-Ala-Gly-Asp-Val | NA | 1.76 |
| 2,4-Hexadien-1-Ol | HMDB0303233 | 1.64 |
| Oleoyl Serotonin | NA | 1.59 |
| 1,2-Ethanediol Monoricinoleate | HMDB0252073 | 1.26 |
| 4-Tert-Butylaniline | NA | 1.18 |
| N-Docosahexaenoyl Proline | HMDB0242020 | 1.04 |
| PE(O-16:0/0:0) | NA | 0.95 |
| N-Docosahexaenoyl Tryptophan | HMDB0242023 | 0.94 |
| PC(14:0/20:1(11Z)) | HMDB0007879 | 0.91 |
| PS(O-18:0/0:0) | NA | 0.90 |
| PE(20:2(11Z,14Z)/19:0) | NA | 0.86 |
| PC(20:2(11Z,14Z)/16:0) | HMDB0008331 | 0.84 |
| Ophthalmic Acid | HMDB0005765 | 0.83 |
| SM(d18:1/TXB2) | HMDB0290523 | 0.80 |
| Sulfamonomethoxine | HMDB0258579 | 0.80 |
| Glycerophosphoric Acid | HMDB0252849 | 0.73 |
| PC(18:0/18:4(9E,11E,13E,15E)) | NA | 0.71 |
| PE(21:0/18:3(9Z,12Z,15Z)) | NA | 0.64 |
| PA(22:4(7Z,10Z,13Z,16Z)/19:1(9Z)) | NA | 0.63 |
| SM(d18:2(4E,14Z)/TXB2) | HMDB0290575 | 0.63 |
| DG(19:0/6 keto-PGF1alpha/0:0) | HMDB0296079 | 0.61 |
| PE-Cer(d14:1(4E)/23:0) | NA | 0.60 |
| PC(18:3(6Z,9Z,12Z)/0:0) | HMDB0010387 | 0.60 |
| (R)-2-((S)-1,2-Dihydroxyethyl)-4,5-Dihydroxyfuran-3(2h)-One | HMDB0248912 | 0.60 |
| PC(P-18:1(9Z)/20:4(5Z,8Z,11Z,14Z)-OH(20)) | HMDB0289741 | 0.57 |
| PC(20:0/18:3(9Z,12Z,15Z)) | HMDB0008272 | 0.56 |
| Erythronic Acid | HMDB0000613 | 0.55 |
| PC(P-16:0/22:6(5Z,7Z,10Z,13Z,16Z,19Z)-OH(4)) | HMDB0289501 | 0.53 |
| 1-O-(2-Methoxy-Hexadecyl)-Sn-Glycerol | NA | 0.53 |
| PC(20:3(8Z,11Z,14Z)/18:3(6Z,9Z,12Z)) | HMDB0008403 | 0.52 |
| PC(15:0/18:2(9Z,12Z)) | HMDB0007940 | 0.51 |
| 1-O-(2r-Hydroxy-Octadecyl)-Sn-Glycerol | NA | 0.50 |
| 1-Iodobutane | HMDB0243906 | 0.49 |
| Ribavirin | HMDB0014949 | 0.49 |
| PC(14:1(9Z)/22:4(7Z,10Z,13Z,16Z)) | HMDB0007922 | 0.47 |
| 3-Propyl Acrolein | HMDB0031496 | 0.46 |
| PE(15:1(9Z)/21:0) | NA | 0.44 |
| Arginylisoleucine | HMDB0028712 | 0.44 |
| SM(d18:1/6 keto-PGF1alpha) | HMDB0290518 | 0.42 |
| PC(P-18:1(11Z)/16:0) | HMDB0011272 | 0.41 |
| PE(15:0/22:0) | HMDB0008907 | 0.41 |
| PS(O-20:0/17:0) | NA | 0.40 |
| PC(O-16:0/18:2(9Z,12Z)) | HMDB0011151 | 0.40 |
| 2-Tetradecylcyclobutanone | HMDB0037517 | 0.37 |
| PC(18:3(9Z,12Z,15Z)/20:3(8Z,11Z,14Z)) | HMDB0008212 | 0.35 |
| PC(20:4(8Z,11Z,14Z,17Z)/20:4(5Z,8Z,11Z,14Z)) | HMDB0008476 | 0.35 |
| PT(20:1(9Z)/20:4(5Z,8Z,11Z,14Z)) | NA | 0.33 |
| PC(O-18:0/18:4(6Z,9Z,12Z,15Z)) | HMDB0304651 | 0.32 |
| PE(19:0/16:0) | NA | 0.31 |
| Phosphate | HMDB0001429 | 0.30 |
| 5-(2-Methylpropyl)Tetrahydro-2-Oxo-3-Furancarboxylic Acid | HMDB0030988 | 0.29 |
| PC(O-18:1(11Z)/18:2(9Z,12Z)) | HMDB0013425 | 0.27 |
| 1,12e-Pentadecadiene | NA | 0.21 |
| 1-Heptadecene | HMDB0302312 | 0.21 |
| Benzothiazole | HMDB0032930 | 0.20 |
| N-(3-Oxo-Decanoyl)-Homoserine Lactone | NA | 0.20 |
| 1-(8-[5]-Ladderane-Octanyl)-2-(8-[3]-Ladderane-Octanyl)-Sn-Glycero-3-Phospho-(1'-Sn-Glycerol) | NA | 0.17 |
| Bis(2-Ethylhexyl) Phthalate | HMDB0249243 | 0.15 |
| 1,1,1,2,3,3,3-Heptafluoropropane | HMDB0244037 | 0.13 |
| 4-Methylimidazole | HMDB0246511 | 0.12 |
| Urolithin C | HMDB0029218 | 0.10 |
| 2,3-Butanediol | HMDB0003156 | 0.09 |
| Photinus Luciferin | NA | 0.07 |
| 3alpha-Hydroxytibolone | HMDB0246255 | -2.16 |
| PC(P-16:0/20:3(5Z,11Z,14Z)-O(8,9)) | HMDB0289425 | -2.16 |
| 9,11alpha-Epoxy-6alpha-Acetoxy-Cholest-7-En-3beta,5alpha,19-Triol | NA | -1.80 |
| 16,16-Dimethyl-Pga2 | NA | -1.78 |
| 16,17-Epoxy-Dha | NA | -1.74 |
| 18-Acetoxy-1alpha,25-Dihydroxyvitamin D3 / 18-Acetoxy-1alpha,25-Dihydroxycholecalciferol | NA | -1.68 |
| PE(P-20:0/17:2(9Z,12Z)) | NA | -1.65 |
| Resolvin D6 | NA | -1.61 |
| 13s,14s-Epoxy-Maresin | NA | -1.60 |
| 16,17-Dihdpe | NA | -1.42 |
| PA(17:2(9Z,12Z)/20:2(11Z,14Z)) | NA | -1.39 |
| 11'-Carboxy-Alpha-Chromanol | HMDB0012515 | -1.37 |
| PC(P-16:0/20:4(5Z,8Z,10E,14Z)-OH(12S)) | HMDB0289443 | -1.35 |
| 11-Deoxy-Pge1 | NA | -1.29 |
| Delta9-Tetrahydrocannabinol Hemisuccinate | HMDB0250983 | -1.25 |
| 13s-Hpode | HMDB0003871 | -1.24 |
| 3a,21-Dihydroxy-5b-Pregnane-11,20-Dione | HMDB0006755 | -1.23 |
| 21-Hdha | NA | -1.18 |
| Leiopathic Acid | NA | -1.13 |
| Anordiol | HMDB0248450 | -1.09 |
| Piperidine-1-Carboxamide | HMDB0256575 | -1.06 |
| Topsentolide C1 | NA | -1.03 |
| Hepoxilin A3 | HMDB0004688 | -1.01 |
| Retinyl Stearate | HMDB0257181 | -1.00 |
| (+/-)-8-Hydroxy-5z,9e,11z,14z,17z-Eicosapentaenoic Acid | HMDB0242271 | -0.96 |
| PE-NMe(18:0/18:3(6Z,9Z,12Z)) | HMDB0113090 | -0.93 |
| Alpha-Calendic Acid | HMDB0030962 | -0.82 |
| Oleyl Arachidonate | NA | -0.81 |
| PC(20:5(5Z,8Z,11Z,14Z,17Z)/P-18:1(11Z)) | HMDB0008523 | -0.79 |
| N-(7z-Tetradecenoyl)-Homoserine Lactone | NA | -0.75 |
| PC(2:0/5-iso PGF2VI) | HMDB0288846 | -0.72 |
| 1,8-Cineol | HMDB0004472 | -0.71 |
| PE(18:3(6Z,9Z,12Z)/19:0) | NA | -0.63 |
| PE-NMe2(16:0/20:4(8Z,11Z,14Z,17Z)) | HMDB0116711 | -0.59 |
| SM(d18:1/18:1(9Z)-O(12,13)) | HMDB0290533 | -0.59 |
| N-Myristoyl Glutamine | HMDB0242050 | -0.57 |
| Phytosphingosine | HMDB0004610 | -0.57 |
| PE(17:0/20:3(8Z,11Z,14Z)) | NA | -0.57 |
| Tarazepide | HMDB0258726 | -0.56 |
| PC(P-16:0/20:5(6E,8Z,11Z,14Z,17Z)-OH(5)) | HMDB0289491 | -0.54 |
| PE(20:4(5Z,8Z,11Z,14Z)/P-16:0) | HMDB0009411 | -0.51 |
| PE-NMe2(20:3(8Z,11Z,14Z)/14:0) | HMDB0114296 | -0.50 |
| 10-[5]-Ladderane-Decanoic Acid | NA | -0.49 |
| PC(18:2(2E,4E)/18:2(2E,4E)) | NA | -0.49 |
| 3-Hexanoyl-Nbd Cholesterol | NA | -0.48 |
| PS(O-16:0/19:0) | NA | -0.45 |
| Ecabet | HMDB0015613 | -0.42 |
| PE(P-18:1(9Z)/PGF1alpha) | HMDB0285574 | -0.41 |
| N-Docosahexaenoyl Phenylalanine | HMDB0062333 | -0.40 |
| PE(P-18:1(9Z)/20:4(5Z,8Z,11Z,13E)(15OH[S])) | NA | -0.36 |
| PE-NMe2(16:0/20:4(5Z,8Z,11Z,14Z)) | HMDB0113951 | -0.35 |
| PE(20:3(8Z,11Z,14Z)/21:0) | NA | -0.34 |
| N-[1-(2-Cyclopropylethyl)-6-Fluoro-4-Hydroxy-2-Oxo-1,2-Dihydroquinoline-3-Carbonyl]Glycine | HMDB0252957 | -0.33 |
| PA(16:0/20:4(8Z,11Z,14Z,17Z)) | HMDB0116701 | -0.32 |
| Tributyl Citrate | NA | -0.28 |
| PE(18:4(6Z,9Z,12Z,15Z)/20:1(11Z)) | HMDB0009197 | -0.28 |
| PE(20:3(8Z,11Z,14Z)/18:0) | HMDB0009354 | -0.27 |
| 5s-Hete Di-Endoperoxide | NA | -0.24 |
| PE(0:0/20:4(5Z,8Z,11Z,14Z)) | HMDB0011487 | -0.20 |
| PC(18:3(9,11,15)-OH(13)/P-16:0) | HMDB0289516 | -0.19 |

**Table S16** Common significantly differential metabolites between DSS VS Ctrl and QAFF-L VS DSS

| **Metabolites** | **Compound ID** | **log2 (FC)** | |
| --- | --- | --- | --- |
| **DSS VS Ctrl** | **QAFF-L VS DSS** |
| 3alpha-Hydroxytibolone | HMDB0246255 | 3.70 | -2.16 |
| 13s,14s-Epoxy-Maresin | NA | 3.58 | -1.60 |
| 13s-Hpode | HMDB0003871 | 2.43 | -1.24 |
| 3a,21-Dihydroxy-5b-Pregnane-11,20-Dione | HMDB0006755 | 2.17 | -1.23 |
| Anordiol | HMDB0248450 | 2.00 | -1.09 |
| 21-Hdha | NA | 1.92 | -1.18 |
| Leiopathic Acid | NA | 1.74 | -1.13 |
| PS(O-16:0/19:0) | NA | 1.71 | -0.45 |
| (+/-)-8-Hydroxy-5z,9e,11z,14z,17z-Eicosapentaenoic Acid | HMDB0242271 | 0.96 | -0.96 |
| PE-NMe2(16:0/20:4(8Z,11Z,14Z,17Z)) | HMDB0116711 | 0.93 | -0.59 |
| Lys-Gln-Ala-Gly-Asp-Val | NA | -2.28 | 1.76 |
| PC(18:3(6Z,9Z,12Z)/0:0) | HMDB0010387 | -1.79 | 0.60 |
| PS(O-18:0/0:0) | NA | -1.64 | 0.90 |
| PE(O-16:0/0:0) | NA | -1.43 | 0.95 |
| Glycerophosphoric Acid | HMDB0252849 | -1.33 | 0.73 |
| (R)-2-((S)-1,2-Dihydroxyethyl)-4,5-Dihydroxyfuran-3(2h)-One | HMDB0248912 | -0.90 | 0.60 |
| Erythronic Acid | HMDB0000613 | -0.68 | 0.55 |
| PC(P-16:0/22:6(5Z,7Z,10Z,13Z,16Z,19Z)-OH(4)) | HMDB0289501 | -0.31 | 0.53 |
| 4-Methylimidazole | HMDB0246511 | -0.14 | 0.12 |
